# Supplementary material
Source: publisher figshare collection journal article supplement (https://tandf.figshare.com/ndownloader/files/17542976)
Supplement: Supplementary file 1 [file 17542976]

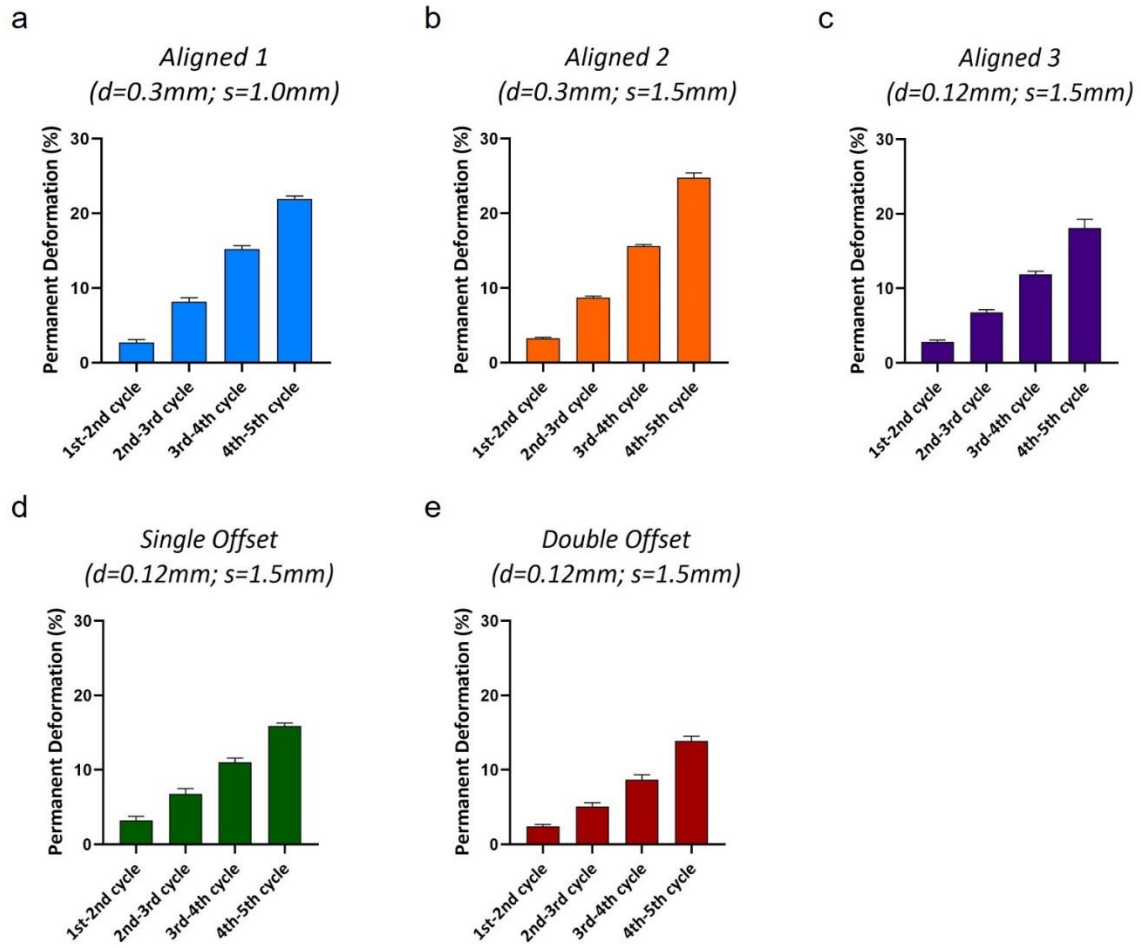

**Supplementary Figure 1.** Permanent deformation at each applied compressive strain amplitude for (a) *Aligned 1* ( $d=0.3\text{mm}$ ;  $s=1.0\text{mm}$ ), (b) *Aligned 2* ( $d=0.3\text{mm}$ ;  $s=1.5\text{mm}$ ), (c) *Aligned 3* ( $d=0.12\text{mm}$ ;  $s=1.5\text{mm}$ ), (d) *Single Offset* ( $d=0.12\text{mm}$ ;  $s=1.5\text{mm}$ ) and (e) *Double Offset* ( $d=0.12\text{mm}$ ;  $s=1.5\text{mm}$ ) scaffold geometries.
